# Supplementary material
Source: publisher site journal article supplement (https://www.dovepress.com/article/245916)
Supplement: Supplementary file 1 [file get_supplementary_file.php]

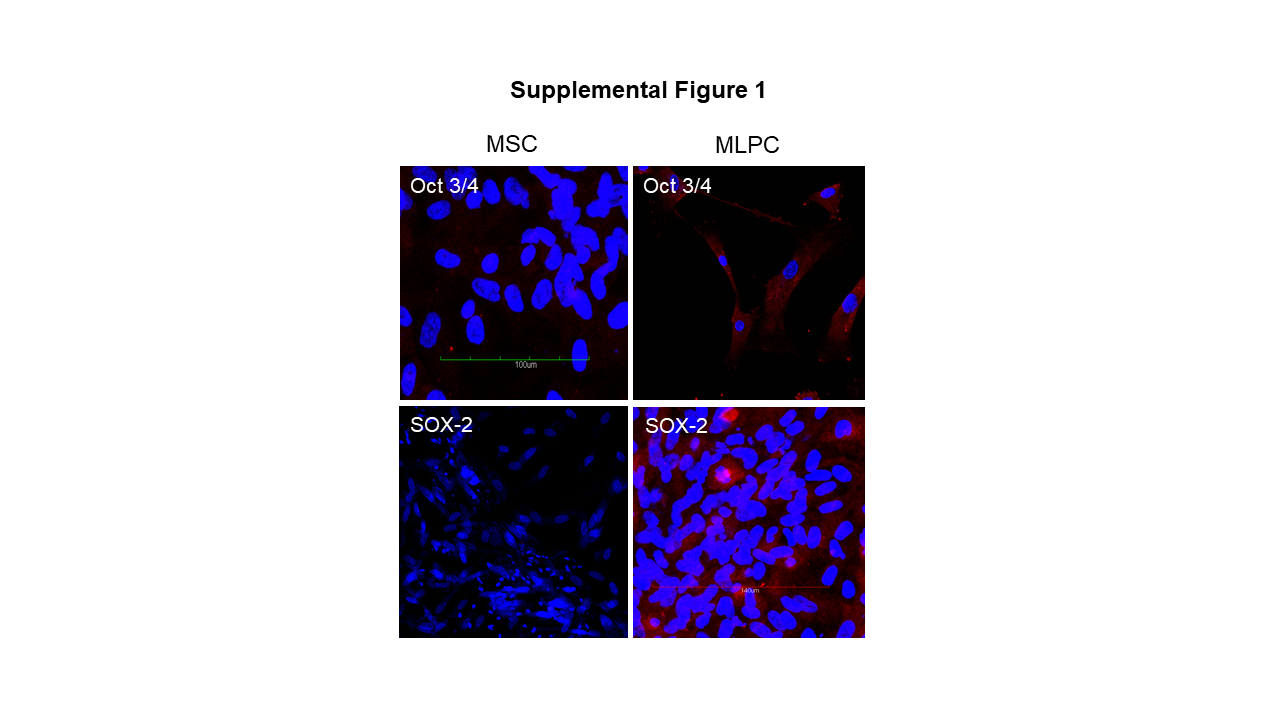


**Supplemental Table 1**

**PCR Primer Sequences**

Primer Sequence Reference

AFP         F: 5′-TGCAGCCAAAGTGAAGAGGGAAGA-3′   12

                  R: 5′-CATAGCGAGCAGCCCAAAGAAGAA-3′

AAT           F: 5'-ACTGTCAACTTCGGGGACAC-3' 13

                    R: 5'-CATGCCTAAACGCTTCATCA-3'

TTR           F: 5'-TCATCGTCTGCTCCTCCTCT-3' 13

                     R: 5'-AGGTGTCATCAGCAGCCTTT-3'

CYP1A2     F: 5'-CAATCAGGTGGTGGTGTCAG-3' 14

                     R: 5'-GCTCCTGGACTGTTTTCTGC-3'

CYP3A4     F: 5'-AAGTCGCCTCGAAGATACACA-3' 13

                     R: 5'-AAGGAGAGAACACTGCTCGTG-3'

CYP2C9      F: 5'-GGACAGAGACGACAAGCACA-3' 14

                     R: 5'-CATCTGTGTAGGGCATGTGG-3'

HNF1A     F: 5'-TACACCACTCTGGCAGCCACACT-3' 15

                    R: 5'-CGGTGGGTACATTGGTGACAGAAC-3'

GAPDH   F: 5′-GCACCGTCAAGGCTGAGAAC-3′ 16

                  R: 5′-ATGGTGGTGAAGACGCCAGT-3′

HGF        F: 5′-GTAAATGGGATTCCAACACGAACAA-3′ 16

                  R: 5′-TGTCGTGCAGTAAGAACCCAACTC-3′

ALB         F: 5'-CTTATTCCAGGGGTGTGTTTCG-3' 17

                  R: 5'-CGATGAGCAACCTCACTCTTGTG-3'

**Supplemental Table 2**

Marker MSC MLPC

| CD45 | Negative | Negative |
| --- | --- | --- |
| CD34 | Negative | Negative |
| CD14 | Negative | Negative |
| CD3 | Negative | Negative |
| CD19 | Negative | Negative |
| CD31 | Negative | Negative |
| CD36 | Negative | Negative |
| HLA-DR | Negative | Negative |
| CD9 | Positive | Positive |
| CD90 | Positive | Positive |
| CD44 | Positive | Positive |
| CD73 | Positive | Positive |
| CD105 | Positive | Positive |
| CD106 | Negative | Positive |
| CD271 | Negative | Negative |
| HLA-ABC | Positive | Positive |
